# Supplementary material for: Trauma-related dissociation and altered states of consciousness: a call for clinical, treatment, and neuroscience research
Source: PubMed Central journal article supplement (PMC4439425; doi:10.3402/ejpt.v6.27905), 2015-05-19
Supplement: EJPT-6-27905-s002.pdf [file EJPT-6-27905-s002.pdf]

## **Trauma-bezogene Dissoziationen und veränderte Bewußtseinszustände: ein Aufruf für Klinische-, Behandlungs- und Neurowissenschaftliche Forschung**

Ruth A. Lanius

Ziel dieses Kommentars ist es trauma-bezogene Dissoziationen und veränderten Bewußtseinszustände im Kontext eines vier-dimensionalen Modells (Frewen & Lanius, 2015), welches unlängst vorgeschlagen wurde, zu beschreiben. Dieses Modell kategorisiert Symptome traumabezogener Psychopathologie in i) jene, die im üblichen Wachheitszustand auftreten, ii) jenen, die dissozierend sind und mit trauma-verbundenen veränderten Bewußtseinsständen verbunden sind: a) Zeit, b) Gedanken, c) Körper, und d) Gefühle. Klinische Anwendungen und zukünftige Forschungsrichtungen in Bezug auf jede Dimension werden diskutiert. Das Vier-Dimensionen Modell stellt einen Rahmen zur Verfügung, geleitet von existierenden Modellen für die Dissoziation. Für zukünftige Forschung überprüft es phänomenologische, neurobiologischen und physiologische Grundlagen der trauma-bezogenen Dissoziationen.

Schlüsselwörter: Dissoziation, Bewußtsein, interozeptives Bewußtsein, dissoziative Subtypen, Gefühl, anteriores Cingulum, Insula, Komplexe PTBS

**Citation:** European Journal of Psychotraumatology 2015, 6: 27905 - <http://dx.doi.org/10.3402/ejpt.v6.27905>
